## Exploring MEG brain fingerprints: evaluation, pitfalls and interpretations

Ekansh Sareen<sup>1</sup>, Sélima Zahar<sup>2</sup>, Dimitri Van De Ville<sup>2,4</sup>, Anubha Gupta<sup>1</sup>, Alessandra Griffa<sup>\*,2,3</sup> and Enrico Amico<sup>\*,2,4</sup>

1 Signal Processing and Biomedical Imaging, Dept. of Electronics and Communication Engineering, IIIT-Delhi, New Delhi, India

2 Institute of Bioengineering, Center for Neuroprosthetics, École Polytechnique Fédérale De Lausanne (EPFL), Geneva, Switzerland

3 Department of Clinical Neurosciences, Division of Neurology, Geneva University Hospitals and Faculty of Medicine, University of Geneva, Geneva, Switzerland

4 Department of Radiology and Medical Informatics, University of Geneva (UNIGE), Geneva, Switzerland

\* The authors contributed equally

Corresponding author : [enrico.amico@epfl.ch](mailto:enrico.amico@epfl.ch)

**Keywords:** Brain fingerprinting, MEG connectivity, Functional connectomes, Brain networks.

### Abstract

Individual characterization of subjects based on their functional connectome (FC), termed “FC fingerprinting”, has become a highly sought-after goal in contemporary neuroscience research. Recent functional magnetic resonance imaging (fMRI) studies have demonstrated unique characterization and accurate identification of individuals as an accomplished task. However, FC fingerprinting in magnetoencephalography (MEG) data is still widely unexplored. Here, we study resting-state MEG data from the Human Connectome Project to assess the MEG FC fingerprinting and its relationship with several factors including amplitude- and phase-coupling functional connectivity measures, spatial leakage correction and frequency bands. To this end, we first employ two identification scoring methods, differential identifiability and success rate, to provide quantitative fingerprint scores for each FC measurement. Secondly, we explore the edgewise and nodal MEG fingerprinting patterns across the different frequency bands (delta, theta, alpha, beta, and gamma). Finally, we investigate the cross-modality fingerprinting

patterns obtained from MEG and fMRI recordings from the same subjects. Our results suggest that fingerprinting performance is heavily dependent on the functional connectivity measure, frequency band, identification scoring method, and spatial leakage correction. We report higher MEG fingerprints in phase-coupling methods, central frequency bands (alpha and beta), and in the visual, frontoparietal, dorsal-attention and default-mode networks. Furthermore, cross-modality comparisons reveal a certain degree of spatial concordance in fingerprinting patterns between the MEG and fMRI data, especially in the visual system. This comprehensive, albeit preliminary investigation of MEG connectome test-retest identification offers a first characterization of MEG fingerprinting in relation to different methodological and electrophysiological factors and contributes to the understanding of fingerprinting cross-modal relationships. We hope that this first investigation will contribute to setting the grounds for MEG connectome identification.

## 1. Introduction

The increasing availability of public neuroimaging data in recent decades (D. C. Van Essen et al., 2012) has given rise to an increasing number of studies aiming at mapping structure and function of the human brain across multiple temporal and spatial scales (Cabral, Kringelbach, & Deco, 2017; Griffa et al., 2017; Wirsich, Amico, Giraud, Goñi, & Sadaghiani, 2020). To this end, a new line of research was born, which models the brain as a network of interconnected functional or structural elements, also known as Brain Connectomics (Bassett & Sporns, 2017; Bullmore & Sporns, 2009; Fornito & Bullmore, 2015; Fornito, Zalesky, & Bullmore, 2016). In brain connectomics, the brain is often modeled as a network composed of nodes or brain regions (defined according to a predefined brain atlas (de Reus & van den Heuvel, 2013)) interconnected by two types of links or edges. The first ones, the structural connections, represent the physical wiring between different brain regions and are assessed using white matter fiber tractography, leading to the structural connectome (Hagmann, 2005; Sporns, Tononi, & Kötter, 2005). The second ones, the functional connections, represent statistical interdependencies between brain regions' signals while subjects are either at rest or performing a task, referred to as functional connectomes (Friston, 1994). Brain connectomics has been proven useful in mapping brain structure and function in large human populations, but also in investigating the association between individual connectome features and behavioral, clinical and genetic profiles (Fornito, Arnatkevičiūtė, & Fulcher, 2019; Fornito, Zalesky, & Breakspear, 2015).

Recent work on functional magnetic resonance imaging (fMRI) (Amico & Goñi, 2018; Finn et al., 2015) shows that functional connectomes can serve as ‘fingerprints’ of individual subjects (Finn et al., 2015; Miranda-Dominguez et al., 2014). This capacity can be maximized across conditions (Abbas et al., 2020) and different scanning protocols (Bari, Amico, Vike, Talavage, & Goñi, 2019). The fact that functional connectomes, in essence a second-order statistical summary of brain activity, contains subject-specific information that can be used for prediction and modelling of individual behavioral and clinical scores, has approached brain connectomics to precision medicine and personalized treatments (Castellanos, Di Martino, Craddock, Mehta, & Milham, 2013; Fernandes et al., 2017; Smith et al., 2015)

Recently, few studies have started to explore connectome fingerprinting in different functional neuroimaging modalities, such as electroencephalography (EEG) and magnetoencephalography (MEG) (M. Demuru et al., 2017; Matteo Demuru & Frascini, 2020). MEG is a complementary modality to fMRI which allows for exploring fast-scale brain communication processes (de Pasquale, Della Penna, Sporns, Romani, & Corbetta, 2016; C. J. Stam & van Straaten, 2012) and offers insights into functional connectivity differences between healthy and pathological populations (Engels et al., 2017; Cornelis J. Stam, 2014). However, it is still unclear whether functional connectomes assessed at these faster temporal scales have fingerprinting properties comparable to those observed at slower temporal scales with fMRI (Amico & Goñi, 2018; Finn et al., 2015). In fact, to date, we still do not know all the factors contributing to brain fingerprinting. The temporal richness of EEG and MEG might give us new insights on the relationship between brain fingerprinting across different time scales or frequency bands. Furthermore, the possibility of disentangling phase and amplitude contributions to MEG/EEG functional connectivity allow for studying how individual connectome features relate to different underlying coupling mechanisms.

In this work, we address these open questions by a comprehensive investigation of the fingerprinting properties of MEG functional connectomes. We start by studying the influence of MEG functional connectivity measures on fingerprinting, and the role of temporal scales and frequency bands on connectome identification. Furthermore, we report the main brain regions and connections that have the highest fingerprinting values in MEG data; i.e., they are the most important for the identification of a single subject in a group. We conclude by comparing and

analyzing the fingerprinting features extracted from MEG data to the ones obtained from fMRI recordings in the same subjects.

## **2. Materials and Methods**

### **2.1 HCP data**

The dataset used for this study consisted of structural and functional (resting-state MEG and fMRI) data from 89 subjects (46% females, mean age  $29.0 \pm 3.6$  years) of the 1200 Subjects release of the Human Connectome Project (HCP) (Larson-Prior et al., 2013; D. C. Van Essen et al., 2012; David C. Van Essen et al., 2013). All included subjects had complete anatomical, resting-state MEG and fMRI data and gave written consent according to the HCP consortium rules. The MEG resting-state recordings were collected at St. Louis University on a whole-head MAGNES 3600 (4D Neuroimaging, San Diego, CA) system including 248 magnetometers and 23 reference channels. Data were recorded at 2034 Hz sampling rate in three separate runs of approximately 6 minutes each within a single-day recording session, with subjects lying in the scanner in a supine position with eyes open. Only the first two runs of each subject were considered in this study. Electrooculography and electrocardiography were acquired for ocular and cardiac artefacts' rejection. Moreover, the outline of each subject's scalp (about 2400 points), anatomical landmarks and localizer coils' positions were digitized at the beginning of the recording session. The fMRI resting-state recordings were acquired at Washington University on a dedicated Siemens 3T 'Connectome Skyra' scanner with a 32-channel head coil on four runs of approximately 15 minutes (TR 720 ms, 2 mm isotropic voxel size), two runs in a session and two runs in a separate day session. The two runs of each session were acquired with left-right (LR) and right-left (RL) phase-encoding directions, respectively. A structural T1w volume with 0.7 mm isotropic voxel size was acquired as well.

Functional data acquired for individual subjects on two separate runs (MEG) or on two separate sessions (fMRI) were tagged as 'test' and 'retest'. Further details on the HCP data can be found elsewhere (Glasser et al., 2013; Larson-Prior et al., 2013; D. C. Van Essen et al., 2012; David C. Van Essen et al., 2013).

### **2.2 Cortical parcellation**

We used the Destrieux cortical parcellation provided by the HCP, which includes 148 regions of interest (Desikan et al., 2006; DESTRIEUX, FISCHL, DALE, & HALGREN, 2010). Moreover,

each cortical region was assigned to one of the seven resting state networks (RSNs) defined by (Yeo et al., 2011) through a majority voting procedure, i.e. each brain region from the Glasser Atlas was assigned to the most highly present (Yeo-defined) functional network (as analogously done in (Amico et al., 2018)).

### **2.3 MEG processing**

We downloaded the preprocessed sensor-level MEG data from the HCP database. Briefly, the MEG preprocessing pipeline includes exclusion of bad channels and noisy data segments (i.e., non-working channels, flat data segments, segments with abnormally high signal variance, segments corrupted by artefacts), band-pass filtering (1.3-150Hz), notch filtering to remove power line artefacts, and decomposition of MEG data into brain and non-brain (artefactual) components. These operations result in a clean representation of the sensor-level MEG data. In order to obtain source-localized neural activity signals, we then projected the sensor-level time-series to 148 locations (sources) in the cortex corresponding to the centroids of the Destrieux regions using FieldTrip r10442 (Oostenveld, Fries, Maris, & Schoffelen, 2010). First, a forward leadfield model was generated for each subject using the single-shell volume conduction (head) model provided by the HCP (Larson-Prior et al., 2013; Nolte, 2003) and the centroids of the 148 cortical regions of interest. Second, the leadfield model was inverted using the Linearly Constrained Minimum-Variance beamforming method to recover the source-level times-series (Veen, Drongelen, Yuchtman, & Suzuki, 1997; Woolrich, Hunt, Groves, & Barnes, 2011) (Fig. 1A). The reconstructed time-series were subdivided into 33 epochs of 8s duration (4072 samples) and bandpass filtered into the five canonical frequency bands: delta (0.5-4 Hz), theta (4-8 Hz), alpha (8-13 Hz), beta (13-30 Hz), and gamma (30-48 Hz) using two-way FIR filters of order 25.

### **2.4 fMRI processing**

For the fMRI comparisons, we took the minimally preprocessed HCP resting-state data (Glasser et al., 2013) and added the following preprocessing steps. First, we applied a standard general linear model (GLM) regression which included: detrending; removal of motion regressors and their first derivatives; removal of white matter (WM), cerebrospinal fluid (CSF) signals and their first derivatives; global signal regression (and its derivative). Secondly, we bandpass filtered the time series in the range [0.01 0.15] Hz and averaged them across the voxels belonging to each one of the 148 Destrieux cortical regions. Finally, region-wise time-series were z-scored.

| Abbreviation | Connectivity Metric                      | Type               | Spatial Leakage Correction | Formulation                                                                                                                                                   |
|--------------|------------------------------------------|--------------------|----------------------------|---------------------------------------------------------------------------------------------------------------------------------------------------------------|
| AEC          | Amplitude Envelope Correlation           | Amplitude coupling | No                         | Pearson's correlation between the instantaneous amplitude time courses                                                                                        |
| AECc         | Amplitude Envelope Correlation corrected | Amplitude coupling | Yes                        | Pearson's correlation between the instantaneous amplitude time courses (pairwise orthogonalized)                                                              |
| PLV          | Phase Locking Value                      | Phase coupling     | No                         | $PLV(t) \triangleq  E[e^{j\Delta\phi(t)}] $                                                                                                                   |
| PLI          | Phase Lag Index                          | Phase coupling     | Yes                        | $\Psi \equiv  E\{\text{sgn}(\Im\{X\})\} $                                                                                                                     |
| wPLI         | Weighted Phase Lag Index                 | Phase coupling     | Yes                        | $\Phi \equiv \frac{ E\{\Im\{X\}\} }{E\{ \Im\{X\} \}} = \frac{ E\{\Im\{X\}\text{sgn}(\Im\{X\})\} }{E\{ \Im\{X\} \}}$                                           |
| PLM          | Phase Linearity Measurement              | Phase coupling     | Yes                        | $PLM = \frac{\int_{-B}^B  \int_0^T e^{i\Delta\phi(t)} e^{-i2\pi f t} dt ^2 df}{\int_{-\infty}^{\infty}  \int_0^T e^{i\Delta\phi(t)} e^{-i2\pi f t} dt ^2 df}$ |

**Table 1**

List of functional connectivity measures used. We separate out functional connectivity measures based on the type of coupling (amplitude or phase) and the effect of spatial leakage artifact (corrected or uncorrected) in our investigation.  $\Delta\phi$ : instantaneous phase difference;  $\Im\{X\}$ : imaginary component of the cross-spectrum  $X$ ;  $\Psi$  and  $\Phi$  represents PLI and wPLI values respectively.

## 2.5 Functional connectivity measures

There is a wide range of connectivity estimation methods for MEG (Colclough et al., 2016), but their impact on MEG fingerprinting properties is currently unknown. In this study, we, therefore, evaluated six different functional connectivity measures based on amplitude- or phase-coupling between MEG time-series, and susceptible or non-susceptible to spatial leakage artefacts (Table 1). Source-reconstructed MEG time-series are spatially correlated due to the limited ability of beamforming approaches to disentangle shared neuronal components perceived by the same sensors. This effect, also known as spatial leakage, can artificially inflate short-range functional connectivity values as well as their cross-subject consistency (Colclough et al., 2016; Palva & Palva, 2012). Corrections for spatial leakage can be embedded in the definition of the functional connectivity measure itself (as is the case of some phase-coupling measures, see below) or can directly act on the source time-series before functional connectivity estimation (e.g., by pairwise orthogonalization of the time-series).

For the MEG data in our investigation, we considered two amplitude-based functional connectivity measures: i) Amplitude Envelope Correlation (AEC) and ii) corrected Amplitude Envelope Correlation (AECc) computed after pairwise symmetric orthogonalization of the MEG (M. J. Brookes, Woolrich, & Barnes, 2012; Hipp, Hawellek, Corbetta, Siegel, & Engel, 2012). Additionally, we considered four phase-based measures: i) the Phase Locking Value (PLV) which evaluates the time varying phase difference, as a measure of phase-locking, between two brain signals (Lachaux, Rodriguez, Martinerie, & Varela, 1999); ii) the Phase-Lag Index (PLI) which estimates the asymmetry around zero of the distribution of the phase differences between two signals (Cornelis J. Stam, Nolte, & Daffertshofer, 2007); iii) the weighted Phase Lag Index (wPLI) which weights the PLI by the magnitude of the imaginary component of the cross-spectrum (Vinck, Oostenveld, van Wingerden, Battaglia, & Pennartz, 2011); and iv) the Phase Linearity Measurement (PLM) which measures the synchronization between brain regions by monitoring their phase differences in time while accounting for narrow differences in the main frequency components of the two signals (Baselice, Sorriso, Rucco, & Sorrentino, 2019; Sorrentino, Ambrosanio, Rucco, & Baselice, 2019). While the PLI and the wPLI are intrinsically insensitive to spatial leakage since they discard zero phase-lag interactions between brain regions, the PLV is susceptible to spatial leakage artefacts. The PLM formulation includes a correction for spatial leakage by excluding phase-difference components  $< \varepsilon$  (with  $\varepsilon$  set to 0.1 Hz according to (Baselice et al., 2019)). For the fMRI data, functional connectivity is conventionally estimated using bivariate methods or recently, using multivariate methods (Aggarwal, Gupta, & Garg, 2017). In this work, we employed widely used Pearson's Correlation (PC) measure to compute the functional connectivity in the fMRI data.

For the amplitude-based measures, employed over each epoch of MEG data, raw or pairwise orthogonalized band-passed time-series were Hilbert-transformed to derive their amplitude envelopes. The AEC (AECc) were then computed as the Pearson's correlation coefficient between the amplitude envelopes and averaged over epochs. For the phase-based measures, for each epoch, the band-passed time-series were Hilbert-transformed to derive the instantaneous phase signals which were used to compute the PLV, PLI, wPL and PLM values. Finally, for each subject and each FC measure, the functional connectivity values were averaged over all the epochs to obtain 10 test/retest averaged functional connectivity matrices per subject of dimension 148 x 148, two for each of the 5 frequency bands (Figure 1B).



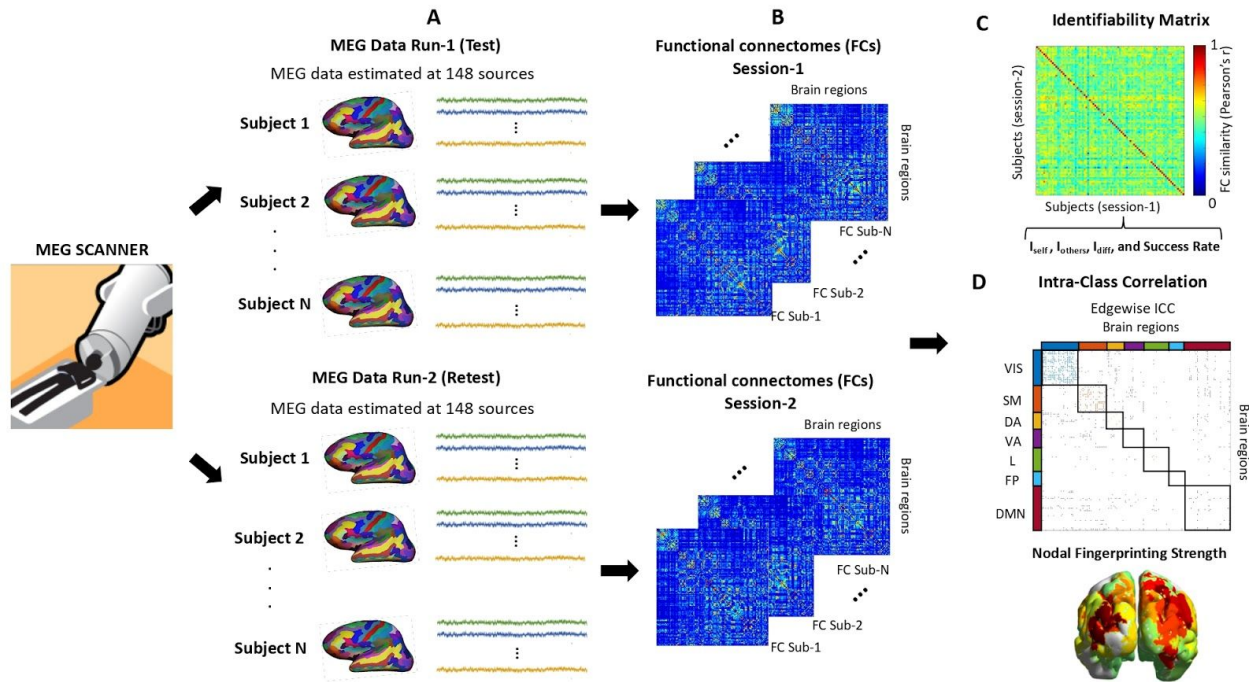

**Figure 1. MEG fingerprinting analysis pipeline.** (A) Resting-state MEG HCP data from two distinct runs for each subject were pre-processed and source-reconstructed to obtain a clean time series from 148 locations in the cortex. (B) Individual functional connectomes were estimated from these time series using different functional connectivity measures (Table 1). (C) An identifiability matrix was computed for each functional connectivity measure from test (columns) - retest (rows) functional connectomes. Values on the diagonal represent the correlations between the scan-rescan connectomes of individual subjects; values outside the diagonal represent the inter-subject connectomes' correlations. The derived  $I_{diff}$  and Success Rate scores were used to assess the fingerprinting capacity of each functional connectivity measure. (D) Edgewise contributions to the overall fingerprinting of each functional connectivity measure were assessed with the intra-class correlation coefficient (ICC) and nodal contributions were assessed with the nodal fingerprinting strength, defined as the column sum of the ICC matrix.

## 2.6 MEG Connectome Fingerprinting

We explored the effect of the functional connectivity measures and frequency bands on the MEG connectome fingerprinting. Moreover, we assessed the contribution in terms of connectome edges and resting state networks to the overall MEG fingerprinting levels.

### 2.6.1 MEG Connectome Fingerprinting: Whole-network level

Inspired by recent work on the maximization of connectivity fingerprints in human functional connectomes (Amico & Goñi, 2018), we study MEG connectome inter-subject identifiability by



defining the “identifiability” matrix (see also Fig. 1C), a square and non-symmetric similarity matrix of size  $S^2$ , where  $S$  is the number of subjects in the dataset. This matrix encodes the information about the self-similarity of each subject with him/herself across the test/retest sessions ( $I_{self}$ , main diagonal elements), and the similarity of each subject with the others ( $I_{others}$ , off-diagonal elements). The similarity between two functional connectomes was quantified as the Pearson’s correlation coefficient between the test/retest connectivity matrices. The difference between  $I_{self}$  and  $I_{others}$  (denominated “Differential Identifiability” -  $I_{diff}$ ) provides a robust score of the fingerprinting level of a specific dataset (Amico & Goñi, 2018). Furthermore, we also employed a binary identification scoring method called success rate defined as the percentage of subjects whose identity was correctly predicted out of the total number of subjects (Finn et al., 2015); with this, we aim to develop a comprehensive understanding of identification scores and their key role in connectome fingerprinting.

### **2.6.2 Contribution of individual functional connections**

We quantified the reliability of the connectome individual edges using the intraclass correlation coefficient, denoted as ICC (Bartko, 1966; McGraw & Wong, 1996), similarly to previous work (Amico & Goñi, 2018). ICC is a widely used measure in statistics which describes how strongly units in the same group resemble each other. The stronger the agreement, the higher its ICC value. We used ICC to quantify the extent to which an edge, i.e. a functional connectivity value between two brain regions, is identifiable across test/retest acquisitions across the subject cohort. In other words, the higher the ICC, the higher the “fingerprinting value” of the edge connectivity (Amico & Goñi, 2018). We generated a square and symmetric ICC matrix of size  $N^2$ , where  $N$  is the number of brain regions (see Fig. 3 A/C). In addition, we investigated the resting state networks identifiability (or fingerprint) by group-averaging the edgewise ICC values across intra- and inter-network connections, thus deriving 7x7 ICC fingerprint matrices corresponding to the Yeo’s seven-network parcellation (Yeo et al., 2011). For this investigation, similarly to the fingerprint of edge connectivity, the higher the ICC, the higher the “fingerprinting value” of that resting-state network. The ICC scores were interpreted following the latest guidelines stated in (Koo & Li, 2016); below 0.50: poor, between 0.50 and 0.75: moderate, between 0.75 and 0.90: good, and above 0.90: excellent.

### **2.6.3 Nodal fingerprinting strength**

Furthermore, we explored the identifiability (or fingerprinting) strength of each brain region (denominated as nodal fingerprinting strength) by summing ICC edgewise matrix column wise.

We generated a distribution of the nodal fingerprinting strength for all the functional connectivity measures and frequency bands of interest. We further visualized this by generating brain renders of nodal fingerprinting strength per region, where we applied a 5<sup>th</sup>-95<sup>th</sup> percentile threshold on the generated nodal fingerprinting strength distribution of each method under each frequency band of interest.

#### **2.6.4 Cross-modality fingerprinting patterns**

We were also interested in exploring the cross-modality similarity between the fingerprinting patterns of MEG and fMRI data. Initially, we conducted a visual comparison between the brain renders of nodal fingerprinting patterns generated using the two modalities. Furthermore, in order to obtain a numerical value for the similarity between the nodal fingerprinting patterns of MEG and fMRI data, we introduced a correlation coefficient metric called Cross-Modality Nodal Correlation Coefficient (denoted as CMNCC). We assessed CMNCC for three metrics: (i) *Nodal fingerprinting strength (NFS)* - where we computed the CMNCC between the nodal fingerprinting strength vectors (computed as described in 2.6.3), of the MEG and fMRI data, (ii) *Whole-brain level*- where we computed the CMNCC between all the edgewise ICC scores of the MEG and fMRI data, and (iii) *Network level* - where we grouped the CMNCC scores as estimated at the previous whole-brain level based on the Yeo Atlas and estimated the subnetwork with the highest cross-modality similarity (based on the aggregate the CMNCC score) of nodal fingerprinting pattern. The CMNCC metric was computed using the Pearson correlation coefficient between the edgewise ICC scores of two modalities and calculated for all FC measures and frequency bands.

### **3. Results**

In this study, we analyzed data from 84 subjects in the S1200 release of the HCP dataset. MEG data consisting of resting-state eyes-opened recordings were pre-processed and then source-reconstructed to 148 cortical regions of interest, based on the Destrieux cortical parcellation (see Materials and Methods). The pre-processed MEG data was used to estimate the Functional Connectivity (FC) between all pairs of regions with six functional connectivity measures of interest i.e. AEC, AECc, PLV, PLM, PLI, and wPLI in the five frequency bands. We evaluated the impact of different functional connectivity measures and frequency bands on the MEG connectome fingerprinting at the whole-network level. We then deepen our investigation by exploring the contribution of single brain regions and edges to the overall MEG fingerprinting.

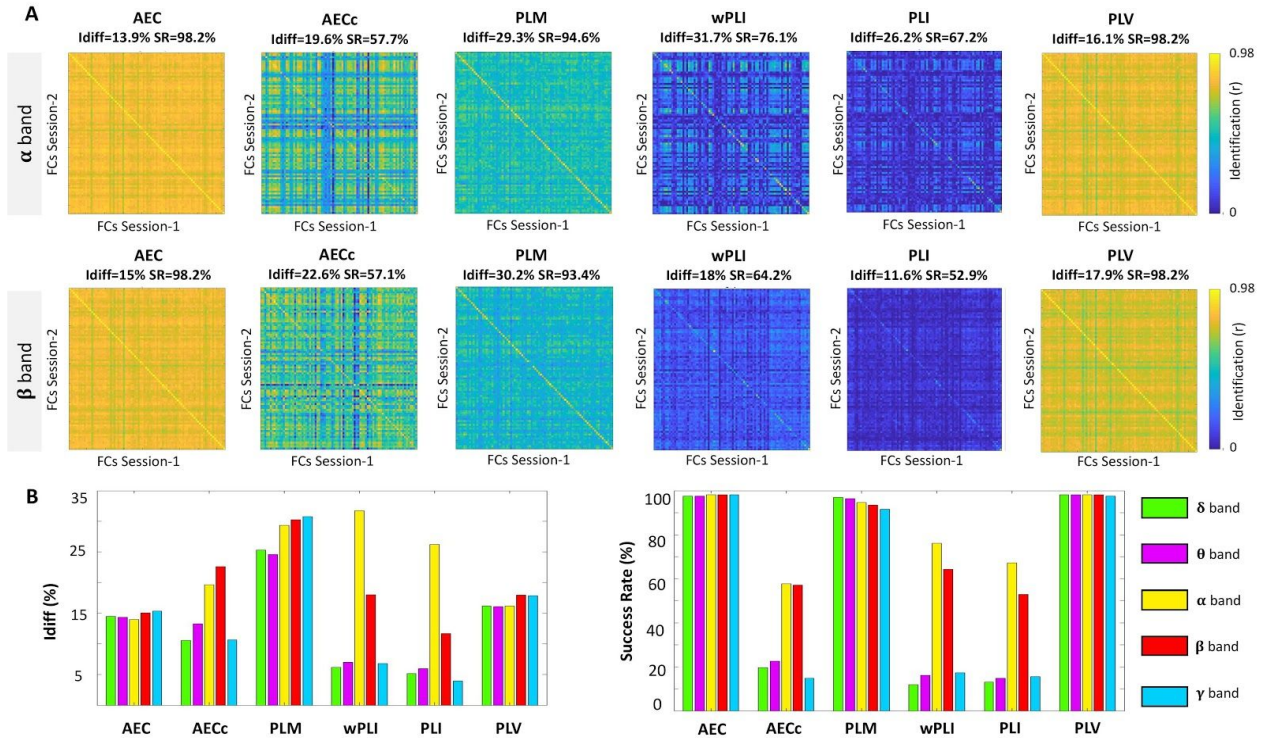

**Figure 2. MEG connectome fingerprints across bands and measures.** Figure shows the performance in connectome identification of four popular phase-based MEG connectome measures (wPLI, PLI, PLV, PLM) and two amplitude based measures (AEC, AECc), across five different frequency bands (delta, theta, alpha, beta, gamma). **(A)** Identifiability matrix for the six connectivity measures employed, shown for the alpha and beta bands. **(B)** Bar plots showing the summary of identification scores employed, i.e.,  $I_{diff}$  and success rate (SR), across the different measures and frequency bands.

### 3.1 MEG connectome fingerprinting across FC measures

We started our MEG connectome fingerprinting exploration by evaluating the impact of different connectivity measures on connectome identification, across different frequency bands. Simultaneously, we also investigated two scoring methods to quantify functional connectome identification. To this aim, we evaluated connectome fingerprinting (or identifiability) on four commonly used phase-coupling measures (PLM, wPLI, PLI, PLV) and two commonly used amplitude-coupling measures (AEC, AECc) (Table 1). As identification scores, we used differential identifiability ( $I_{diff}$ ) and success rate (SR) (see Methods). Fig. 2 depicts the identification performance of the different connectivity measures and scoring methods reported for the alpha and beta frequency bands; the results for other three bands, i.e. delta, theta, and gamma bands, are provided in Supplementary Fig. S1. We observed large variability of

identifiability measures across the FC measures and, bands with  $I_{diff}$  and SR ranging from 11.6% to 31.7% and 52.9% to 98.2%, respectively. Across the frequency bands, we observed relatively higher identifiability in the alpha band ( $I_{diff}$ : 22.8%  $\pm$  6.67%, SR scores: 82%  $\pm$  15.9%) and in the beta band ( $I_{diff}$ : 19.2%  $\pm$  5.93%, SR scores: 77.3%  $\pm$  19.6%). In the alpha band specifically, we observed higher  $I_{diff}$  (25.82%  $\pm$  5.94%) and SR scores (84%  $\pm$  12.83%) in phase-based measures as compared to amplitude-based measures with relatively lower  $I_{diff}$  (16.75%  $\pm$  2.85%) and SR scores (77.95%  $\pm$  20.25%). We also observed that wPLI, PLI, and AECc are the measures where the identifiability levels are most variable across the frequency bands with  $I_{diff}$  ranging from 13.74%  $\pm$  10.05% in wPLI, 10.56%  $\pm$  8.25% in PLI, and 15.3%  $\pm$  4.92% in AECc and SR ranging from 37.14%  $\pm$  27.34% in wPLI, 32.71%  $\pm$  22.83% in PLI, and 34.38%  $\pm$  18.9% in AECc. Besides, the highest identifiability scores, among the most variable measures (i.e. wPLI, PLI, and AECc), were observed in the central frequency bands (alpha and beta). Specifically, PLM seems to be the preferred connectivity measure for connectome identification given the relatively higher and consistent identification scores ( $I_{diff}$ : 28.04%  $\pm$  2.57%, SR: 94.63%  $\pm$  1.95%) observed for this measure across frequency bands (Fig. 2B). We also observe that measures susceptible to spatial leakage (i.e. AEC and PLV) have lower  $I_{diff}$  (AEC: 14.6%  $\pm$  0.49% PLV: 16.76%  $\pm$  0.89%) and SR (AEC: 97.96%  $\pm$  0.29% PLV: 98.08%  $\pm$  0.23) scores across all frequency bands. In addition, we observed a characteristic change in the identifiability levels of the measures susceptible to spatial leakage (i.e. AEC and PLV) between the two identification scores under investigation; relatively higher identifiability score for SR and lower scores for  $I_{diff}$ .

### 3.2 MEG connectome fingerprinting: Edgewise identifiability

After exploring fingerprinting at the whole-network level, we then deepened our investigation by exploring edgewise fingerprinting properties. Figure 3 depicts the edgewise ICC matrices (Fig. 3A, 3C), intra- and inter-network identifiability patterns (Fig. 3B, 3D), and the nodal fingerprinting strength distribution across functional connectivity measures of frequency bands (Fig. 3E). For this investigation, we report the results only for a subset of FC measures, namely AEC, AECc, PLM, and wPLI. The results of PLV and PLI were similar to the ones obtained from AEC and wPLI, respectively, and are provided in Supplementary Fig. S2.

Fig. 3 shows that the nodal fingerprinting patterns, both at the edge level and the grouped sub-network level, are widespread and specific to the functional connectivity measure employed. Furthermore, the edgewise fingerprinting patterns associated with AECc and PLM

connectomes depicted a certain degree of spatial specificity, with higher intra-network group-average ICC scores (denoted as average ICC scores). The alpha band of the AECc measure depicted 'good' ICC in the visual subnetwork (average ICC score = 0.76) and 'moderate' ICC in the ventral-attention subnetwork (average ICC score = 0.72); the beta band also depicted 'good' ICC in the visual subnetwork (average ICC score = 0.77) and the frontoparietal subnetwork (average ICC score = 0.80). The alpha band of the PLM measure depicted 'moderate' ICC in the visual subnetwork (average ICC score = 0.72) and 'good' ICC in the somatomotor (average ICC score = 0.75) and dorsal-attention (average ICC score = 0.75) subnetworks. The edgewise fingerprinting patterns in the wPLI measure were not spatially specific in the beta band (poor ICC, average ICC score < 0.42); the alpha band however depicted 'good' ICC in the visual subnetwork (average ICC score = 0.70). Furthermore, the nodal fingerprinting patterns in the AEC measure were relatively lesser marked than AECc and PLM measures with poor ICC (average ICC scores < 0.5); However, the visual and somatomotor subnetworks depicted moderate ICC ( $0.5 < \text{average ICC score} < 0.7$ ). The comparison of fingerprinting patterns between the AEC and the AECc measures illustrates the effect of leakage correction in improving the fingerprinting ability resulting in higher group-average ICC scores in AECc as compared to AEC.

The nodal fingerprinting strength distribution across frequency bands is depicted in Fig. 3E. The distribution of the nodal fingerprinting pattern appears to be specific to frequency bands as well. The nodal fingerprint strength is relatively higher in the alpha (AEC:  $95.39 \pm 6.33$ ; AECc:  $96.95 \pm 7$ ; PLM:  $98.22 \pm 9.4$ ) and the beta (AEC:  $95.8 \pm 4.76$ ; AECc:  $96.57 \pm 7.3$ ; PLM:  $95.37 \pm 5.6$ ) frequency bands as compared to other frequency bands in most of the measures under investigation. In the PLM measures, the nodal fingerprinting strength is relatively higher in the delta ( $112.24 \pm 5.3$ ), theta ( $111.33 \pm 5.2$ ) and gamma ( $73.87 \pm 8.1$ ) band in addition to the alpha and beta band as compared to other measures. On the other hand, relatively lower and spatially unspecific edgewise identifiability patterns in the wPLI measure result in a relatively lower nodal fingerprinting strength in most of the frequency bands (delta:  $28.13 \pm 4.7$ ; theta:  $32.33 \pm 4.9$ ; beta:  $43.9 \pm 5.0$ ; gamma:  $13.48 \pm 6.6$ ). In the alpha band, however, nodal fingerprinting strength values are comparable to those observed in the other frequency bands ( $64.53 \pm 13.68$ ).



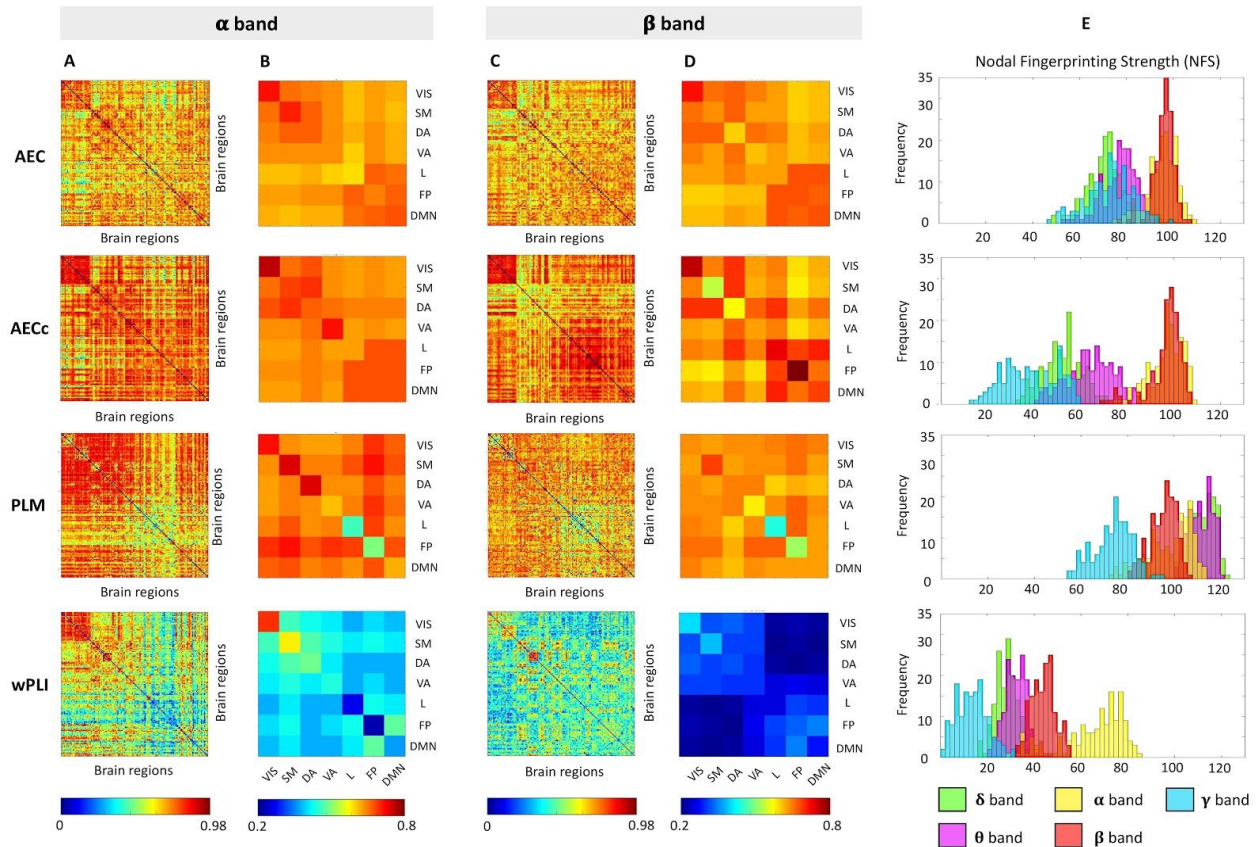

**Figure 3. Edgewise fingerprinting across connectivity measures and bands. (A) & (C)** Edgewise MEG connectivity fingerprints as measured by intra-class correlation (ICC), reported for AEC, AECc, PLM, and wPLI functional connectivity measures, and for the alpha and beta bands, respectively. **(B) & (D)** The ICC average within and across the seven Yeo's resting-state network edges, for the alpha and beta bands, respectively. **(E)** The nodal fingerprinting strength distribution across the five frequency bands. VIS = visual; SM = sensorimotor; DA = dorsal attention; VA = ventral attention; L = limbic; FP = frontoparietal; DMN = default-mode network .

### 3.3 MEG connectome fingerprinting: Nodal fingerprinting scores

The brain render of the nodal fingerprinting strength for fMRI data and select three MEG measures (AEC, AECc, and PLM) for theta, alpha, and beta band are depicted in Fig. 4. The figure characteristically highlights the cortical regions with a relatively higher contribution to the connectome identifiability. We observe spatially localized patterns specifically in the AECc and PLM measure. These patterns are prominently observed in the theta and the alpha band and localized to the posterior regions of the brain (temporal, occipital and parietal regions) in all the measures. In the AECc measure, the nodal fingerprinting strength is larger in the temporo-parietal regions including parts of the default-mode, frontoparietal, and dorsal-attention



networks. In the PLM measure, parieto-occipital regions with larger nodal fingerprinting strength involve the visual, default-mode, and dorsal-attention networks. Interestingly, the beta band for the AECc measure adds the frontal region contributions to the consistent parieto-medial nodal fingerprinting pattern, specifically involving the frontoparietal and default-mode networks. In the PLM measure, the pattern becomes more localized to the somatomotor region with some extent of localization to the parieto-occipital regions as we move to the higher frequency beta band (Fig. 4A). We also observe a high fingerprinting specificity to the precuneus region of the brain across all the frequency bands of the PLM measure. In the AEC measure we observe relatively lower spatial specificity in the theta band as compared to the nodal fingerprinting patterns in the theta band of the AECc and PLM measure. However, the alpha and beta bands of the AEC measure depict notable spatial specificity of the fingerprinting patterns to the temporo-parietal regions of the brain involving frontoparietal, default-mode, and dorsal-attention networks. Supplementary Fig. S3 comprehensively depicts the brain render of the nodal fingerprinting strength for all the six MEG measures (AEC, AECc, PLM, PLV, PLI, and wPLI) and for all the five frequency bands (delta, theta, alpha, beta, and gamma).

Comprehensively, it is observed that the posterior brain regions, particularly the parieto-occipital lobes and to some extent the temporal lobe, have a central fingerprinting role, particularly at the slower temporal scales (theta and alpha bands). Besides this, a distinctive participation of frontal (in AECc measure) and somatomotor (in PLM measure) regions develops as we move from slower (theta, alpha) to faster (beta) temporal scales (see Supplementary Fig. S3).

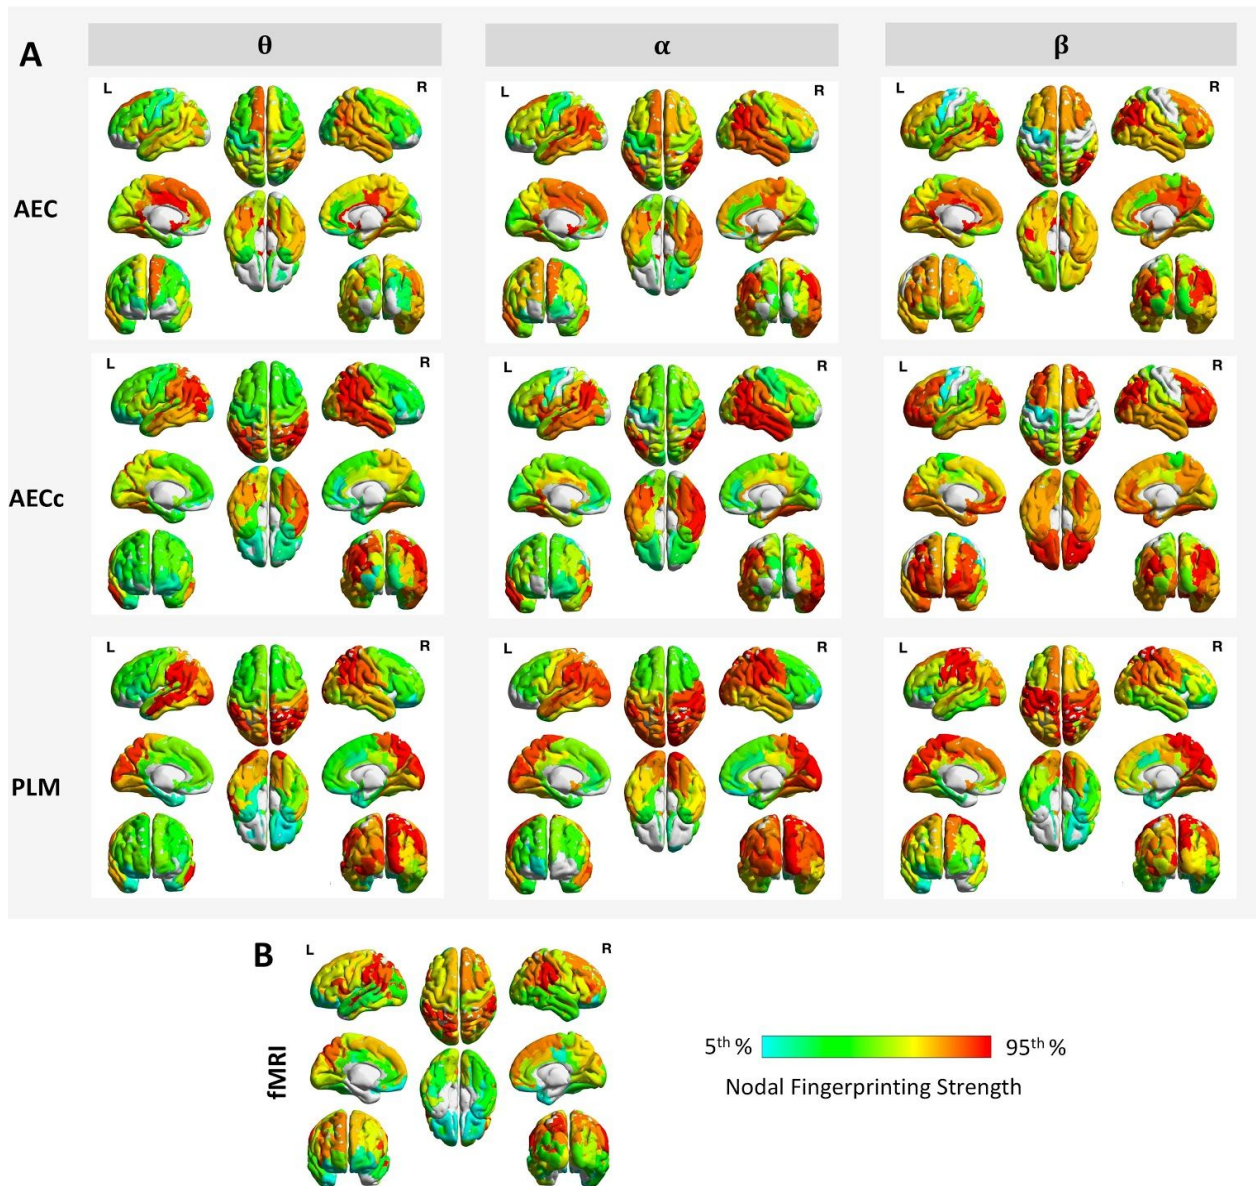

**Figure 4. Nodal fingerprinting patterns in MEG and fMRI.** (A) Brain render of ICC subject identifiability as nodal fingerprinting strength per region reported for three MEG connectivity measures (AEC, AECc, PLM) and three frequency bands (theta, alpha, beta). (B) The nodal fingerprinting pattern obtained from the fMRI connectomes of the same subjects. The nodal fingerprinting strength per region computed as the sum of columns of ICC edgewise matrix and represented at 5<sup>th</sup>-95<sup>th</sup> percentile threshold.

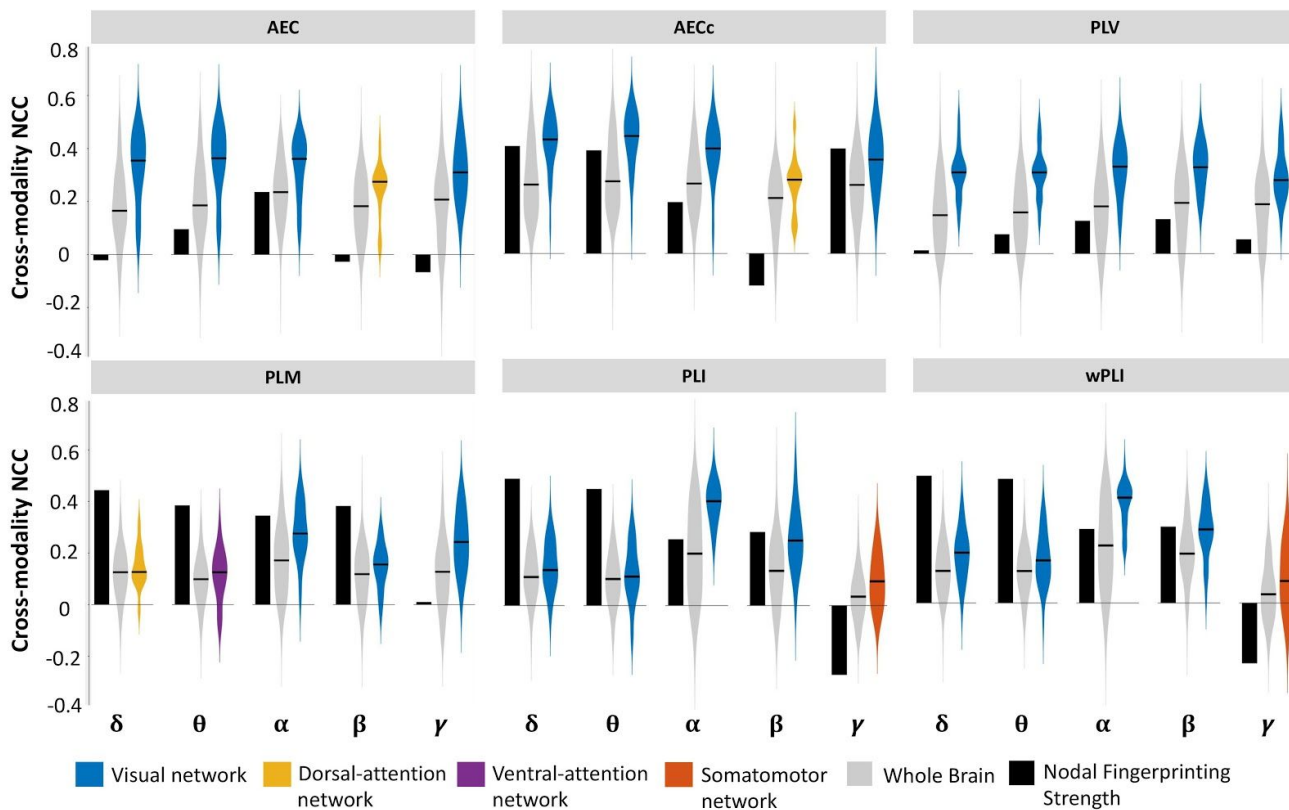

**Fig. 5. Cross-Modality connectome fingerprinting.** The Cross-Modality Nodal Correlation Coefficient (CMNCC) comparison between nodal fingerprinting maps of MEG (AEC, AECc, PLV, PLM, PLI, and wPLI) and fMRI data for all the five frequency bands (delta, theta, alpha, beta, and gamma). The CMNCC comparison was conducted for three metrics: (i) Nodal Fingerprinting Strengths (Depicted in Black), (ii) Whole brain (Depicted in Grey), and (iii) Network level (Depicted in colors associated with Yeo networks). The Network Level metric only represents the network with highest similarity (i.e. highest CMNCC score) between the two modalities. AEC: Amplitude Envelope Correlation; AECc: Amplitude Envelope Correlation corrected; PLV: Phase Locking Value; PLM: Phase Linearity Measure; PLI: Phase Lag Index; wPLI: weighted Phase Lag Index.

### 3.4 Cross-modality connectome fingerprinting

We also visualized the nodal fingerprinting pattern from the fMRI data, depicted in Fig. 4B, to conduct a comparative analysis between the nodal fingerprinting patterns between the two imaging modalities (i.e. MEG and fMRI) and the role of different functional connectivity measures. The nodal fingerprinting patterns from the fMRI data depict a notable spatial specificity to the parietal region of the brain specifically reflecting the higher fingerprinting contribution of ventral-attention, dorsal-attention, and frontoparietal networks (see Fig. 4B). Furthermore, the results of the CMNCC investigation (see Methods), as depicted in Fig. 5, reveals interesting cross-modality similarities between the nodal fingerprinting patterns. The

leakage-corrected measures (AECc, PLM, PLI, wPLI) depict relatively higher CMNCC scores i.e. more similar cross-modality fingerprinting pattern, for NFS metric as compared to leakage-uncorrected measures (AEC and PLV). In addition, among these measures with relatively higher CMNCC scores, we observe relatively high cross-modality similarity of fingerprinting patterns at lower temporal scales (delta and theta) as compared to higher temporal scales (alpha, beta, and gamma). We further observe that the visual network, in general, is prominently identified as the network with highest cross-modality fingerprinting similarity (high CMNCC scores) across all the measures and frequency bands.

## **Discussion**

With the advancement in neuroscientific research and the availability of large public datasets, researchers are now exploring exciting new avenues in the field of brain connectomics. This research area provides a supplementary insight in exploring the interconnected neural systems by comprehensively mapping the neural elements and interconnections that constitute the brain (Fornito & Bullmore, 2015). Brain connectome fingerprinting has risen as a novel influential field in brain connectomics (Amico & Goñi, 2018; Finn et al., 2015; Miranda-Dominguez et al., 2014) and has opened up a new way of extracting and evaluating individual features contained in functional and structural connectomes. Researchers are now exploring how connectome-wide patterns evaluated through brain connectomic measures can be leveraged for potential clinical translational research as, for instance, precision medicine (Fernandes et al., 2017; Hampel, Vergallo, Perry, Lista, & Alzheimer Precision Medicine Initiative (APMI), 2019). However, the accomplishment of such research goals requires a comprehensive understanding of the role of various factors that contribute to brain connectome fingerprinting such as different brain connectivity measures, frequency bands, identification scoring methods, and neuroimaging modalities.

In this work, we comprehensively investigated the fingerprinting properties of functional connectomes extracted from magnetoencephalography (MEG) data and compared them to fMRI fingerprinting. We investigated the role of various functional connectivity measures (amplitude and phase coupling), identification scoring methods (differential identifiability and success rate), and frequency bands on functional connectome fingerprinting. We, then, deepened our investigation by evaluating the nodal fingerprinting patterns (edge-level and grouped sub-network level) to unravel the spatial specificity of brain fingerprints across

sub-networks and cortical regions. We further extended the study by conducting a comparative analysis of fingerprinting between fMRI and MEG data to develop a cross-modality understanding of connectome fingerprinting.

We observed interesting differences between the two categories of functional connectivity measures on connectome identification. The phase-based measures depicted higher identification scores as compared to amplitude-based measures, as depicted in Fig. 2, with some exceptions. Furthermore, the confounds introduced in the functional connectivity estimation due to spatial leakage are characteristically visible in the leakage-uncorrected measures; i.e., AEC and PLV, depicted in Fig. 2. In fact, we observed high levels of self-similarity (high  $I_{self}$ ) as well as low inter-subject variability (high  $I_{others}$ ). This might depend on the effect of spatial leakage that, despite being a whole-brain connectome artifact, it still appears to inflate self-similarity scores. Moreover, when corrected and uncorrected measures are compared, the effect of leakage correction by regressing out the shared signal is distinctively observed in the leakage-corrected measure AECc, where a noticeable decrease in the identification scores (specifically, success rate) is observed. These findings are consistent with previous reports (Colclough et al., 2016) and reveal the significance of leakage correction of functional connectivity measures for connectome fingerprinting. The results further indicate characteristic importance of alpha and beta frequency bands for the majority of leakage-corrected measures (AECc, wPLI, and PLI), in fingerprinting identification. This finding possibly indicates the characteristic role of cognitive engagement level in fingerprinting estimation with distinctively higher identification scores in relaxed or passive-attentive state (i.e. alpha band) and active state (i.e. beta band) (Abhang, Gawali, & Mehrotra, 2016; Engel & Fries, 2010; Klimesch, 2012), and lower identification scores in states with inactive engagement (delta and theta frequency band) (Abhang et al., 2016). We also investigated the role of identification scoring methods in fingerprinting estimation by conducting a comparative analysis between two identifications scoring methods (Fig. 2B). We observed a noticeable difference (on average, lower  $I_{diff}$  and higher SR values) between the two identification scoring methods specifically for leakage-uncorrected measures; i.e., AEC and PLV. This difference likely results from an overestimation of identification scores through the SR method, that focuses solely on subject-specific test-retest similarity. Considering the high identifiability value of brain morphological features (Mansour L, Tian, Yeo, Cropley, & Zalesky, 2021), the subject-specific test-retest similarity may be inflated by spatial-leakage artifacts that relate to the underlying sources' distribution and, possibly, to the subject-specific cortical morphology. However,  $I_{diff}$



score consistently accounts for this effect, penalizing the similarity score by the  $I_{others}$  term quantifying the similarity with the others' connectomes. These considerations suggest that  $I_{diff}$  is more sensitive to identification changes than the success rate as it accounts for both inter- and intra-individual variability. Collectively, these findings suggest that fingerprinting estimation is dependent on the nature of functional connectivity measure, the frequency band of estimation, and the identification scoring method.

We extended our fingerprinting investigation from whole-network level to edge-level to examine the identification potential of a brain node based solely on the characteristic functional connectivity patterns across the subjects in test-retest condition. Our results based on intraclass correlation show some spatial specificity and functional networks (FNs) patterns. We observed that visual network was markedly identifiable across all the measures in alpha band; in addition with somatomotor and dorsal-attention network in the PLM measure and to some extent cross-limbic, frontoparietal, and default mode networks in the AEC and AECc measures. These findings advance the idea that the visual network is primarily more involved in the edgewise identifiability in a test-retest condition and thus holds a strong potential for accounting inter-subject variability. Furthermore, in terms of frequency bands, the overall identification pattern becomes relatively less pronounced in the beta band as compared to the alpha band with a few exceptions. This may occur as an evidence of higher fingerprinting potential in relaxed or passive-attentive cognitive states (i.e. alpha band). Coherent to this, recent studies have also reported higher fingerprinting potential in relaxed state (resting state) as compared to active engagement state (task state) (Amico & Goñi, 2018; Finn et al., 2015).

Another crucial aspect of our investigation was evaluating the nodal fingerprinting strength to characterize and visualize the fingerprinting potential of cortical regions. Our investigation started with assessing the nodal fingerprinting strength distribution across all the five frequency bands. The findings depicted in Fig. 3E reveals the characteristic dependence of nodal fingerprinting strength on frequency bands with prominently higher strength distributions in the alpha and beta bands. This finding is coherent with our previous results where we learn that fingerprinting potential depicts specificity to level of cognitive engagement; i.e., higher in relaxed or passive-attentive state (i.e. alpha band) and active state (i.e. beta band). Furthermore, the findings from the brain render visualization of the nodal fingerprinting strength as depicted in Fig. 4, revealed that the nodal fingerprinting patterns have characteristic cortical specificity. This specificity was primarily observed in the posterior regions of the brain specifically the



parieto-occipital regions and to some extent the temporal region at lower frequency scales. From a network perspective, higher fingerprinting contribution of default-mode, dorsal-attention, and frontoparietal networks was observed. These findings illustrate a strong agreement between the test-retest conditions at these cortical regions (or functional networks) and thus accentuates their strong potential in future fingerprinting research (Amico & Goñi, 2018).

The final goal of our fingerprinting investigation was to discern if the fingerprinting patterns are shared across neuroimaging modalities. Our analysis demonstrated that irrespectively of the disparate nature of neuroimaging modalities in consideration, there exists a certain degree of similarity in the nodal fingerprinting patterns between MEG and fMRI. This similarity was prominently observed in leakage-corrected measures (AECc, PLM, PLI, wPLI) for the nodal fingerprinting strength factor. This finding is consistent with related studies and states the significant role of spatial-leakage correction in cross-modality fingerprinting-similarity detection. Additionally, we also report a higher similarity at lower temporal scales (delta and theta) between the fingerprinting patterns in the MEG and fMRI data for the NFS metric. This finding partially agrees with previous studies (Matthew J. Brookes et al., 2011; Garcés et al., 2016; Hipp et al., 2012; Pasquale et al., 2010) where functional connectivity similarities between MEG and fMRI were evident in the theta, alpha, beta, and gamma bands. On the contrary, the delta band presented smaller similarities. However, it is important to note that our work does not directly investigate the cross-modality similarity of functional connectivity, but instead explores the cross-modality similarity of connectome identifiability patterns. Furthermore, the spatial distribution of fingerprinting patterns were observed to be specific to the parietal region of the brain in both MEG and fMRI. Results from the CMNCC metric at the network-level further revealed the characteristic occurrence of the visual network to be the most identifiable across the modalities for all measures and frequency bands. This finding is consistent with several other comparative studies on MEG and fMRI modalities which have demonstrated a high overlap of functional interactions in the posterior region of the brain (Power, Schlaggar, Lessov-Schlaggar, & Petersen, 2013; Tewarie et al., 2014); specifically in the occipital lobe (Lankinen et al., 2018; Liljeström, Stevenson, Kujala, & Salmelin, 2015) between the two modalities. Therefore, our current findings imply a degree of spatial concordance between the nodal fingerprinting patterns across the two imaging modalities. The divergences between the cross-modality similarities of functional connectivity and identifiability patterns illustrate the complexity of the relationship between hemodynamics and electrophysiology (Hipp & Siegel, 2015).

Brain fingerprints are influenced by many factors: extraction of the individual connectivity information, choice of the functional connectivity measure, specific preprocessing pipelines, impact of artifacts (i.e. spatial leakage). Owing to the temporal richness of MEG data we were able to dig deeper into all these contributions to brain fingerprinting, and partially separate them throughout our analysis. The findings of our study do indicate a strong potential of MEG connectome fingerprinting by demonstrating a robust and accurate subject identifiability. Furthermore, our extended investigation on cross-modality (fMRI/MEG) fingerprints provides preliminary evidence of a certain degree of spatial concordance of fingerprinting patterns across MEG and fMRI data. These findings might pave the way to developing a cross-modality connectome fingerprinting paradigm for reliable and robust precision medicine applications.

This study has limitations. In our study we conducted an exhaustive analysis of the role of functional connectivity measure in estimating fingerprinting by evaluating six prominently used amplitude- and phase-based coupling methods. However, we did not investigate the role of effective connectivity on fingerprinting; future studies should explore our framework with a more diverse set of connectivity measures. In the present work we did not consider different source reconstruction strategies and spatial-leakage correction methods for obtaining source-localized MEG data. The familial relationships in the MEG dataset and its relationship to fingerprinting should be further investigated. The impact of different parcellation schemes on MEG fingerprinting should be explored. Recent studies have shown that several choices during MEG data pre-processing steps (i.e. forward/inverse model, beamforming method, and different implementation software) can affect the results in source space (Gross et al., 2013; van Diessen et al., 2015). Furthermore, in this work the cross-modality fingerprinting investigation was restricted to MEG and fMRI data. Building from our cross-modality framework, future studies should explore the extent of fingerprint concordance between different neuroimaging modalities including EEG, DTI, PET among others. Finally, it would be interesting to extend the proposed fingerprinting framework to task-specific data to explore the relationship between fingerprinting patterns and task-related functional organization.

## **Conclusion**

In conclusion, we have reported an exhaustive investigation of fingerprinting estimation using MEG data where we explored the relationship between brain fingerprints and various factors including functional connectivity measures, frequency bands, spatial leakage, identification

scoring methods, and neuroimaging modality. We explored the contributions on MEG fingerprints from all these factors, and found that its accurate individual estimations require careful consideration on these features, especially on the FC measure and frequency band chosen. We hope that future research in brain connectomics will benefit from this first comprehensive (albeit preliminary) overview on the brain fingerprinting properties of MEG data.

### **Acknowledgments**

Data were provided [in part] by the Human Connectome Project, WU-Minn Consortium (Principal Investigators: David Van Essen and Kamil Ugurbil; 1U54MH091657) funded by the 16 NIH Institutes and Centers that support the NIH Blueprint for Neuroscience Research; and by the McDonnell Center for Systems Neuroscience at Washington University. EA acknowledges financial support from the SNSF Ambizione project "Fingerprinting the brain: network science to extract features of cognition, behavior and dysfunction" (grant number PZ00P2\_185716). ES and AG thank the Centre of Excellence in Healthcare, IIT-Delhi, India for their support.

### **Code and data availability**

The code (in MATLAB) used for this analysis will be available upon acceptance on EA EPFL webpage, together with some sample connectomes to run the analyses reported in the manuscript.

### **Author Contributions**

ES, AG and EA processed the data, conceptualized the study and designed the framework; ES performed the connectivity analyses; all authors interpreted the results and wrote the manuscript.

### **Competing Financial Interests**

The authors declare no competing financial interests.

### **References**

- Abbas, K., Amico, E., Svaldi, D. O., Tipnis, U., Duong-Tran, D. A., Liu, M., ... Goñi, J. (2020). GEF: Graph embedding for functional fingerprinting. *NeuroImage*, 221, 117181.
- Abhang, P. A., Gawali, B. W., & Mehrotra, S. C. (2016). *Introduction to EEG- and Speech-Based Emotion Recognition* (1st ed.). USA: Academic Press, Inc.
- Aggarwal, P., Gupta, A., & Garg, A. (2017). Multivariate brain network graph identification in functional MRI. *Medical Image Analysis*, 42, 228–240.
- Amico, E., & Goñi, J. (2018). The quest for identifiability in human functional connectomes. *Scientific Reports*, 8, 8254.
- Bari, S., Amico, E., Vike, N., Talavage, T. M., & Goñi, J. (2019). Uncovering multi-site

- identifiability based on resting-state functional connectomes. *NeuroImage*, *202*, 115967.
- Bartko, J. J. (1966). The Intraclass Correlation Coefficient as a Measure of Reliability. *Psychological Reports*, *19*, 3–11.
- Baselice, F., Sorriso, A., Rucco, R., & Sorrentino, P. (2019). Phase Linearity Measurement: A Novel Index for Brain Functional Connectivity. *IEEE Transactions on Medical Imaging*, *38*, 873–882.
- Bassett, D. S., & Sporns, O. (2017). Network neuroscience. *Nature Neuroscience*, *20*, 353–364.
- Brookes, M. J., Woolrich, M. W., & Barnes, G. R. (2012). Measuring functional connectivity in MEG: A multivariate approach insensitive to linear source leakage. *NeuroImage*, *63*, 910–920.
- Brookes, Matthew J., Hale, J. R., Zumer, J. M., Stevenson, C. M., Francis, S. T., Barnes, G. R., ... Nagarajan, S. S. (2011). Measuring functional connectivity using MEG: Methodology and comparison with fMRI. *Neuroimage*, *56*, 1082–1104.
- Bullmore, E., & Sporns, O. (2009). Complex brain networks: Graph theoretical analysis of structural and functional systems. *Nature Reviews Neuroscience*, *10*, 186–198.
- Cabral, J., Kringelbach, M. L., & Deco, G. (2017). Functional connectivity dynamically evolves on multiple time-scales over a static structural connectome: Models and mechanisms. *NeuroImage*, *160*, 84–96.
- Castellanos, F. X., Di Martino, A., Craddock, R. C., Mehta, A. D., & Milham, M. P. (2013). Clinical applications of the functional connectome. *NeuroImage*, *80*, 527–540.
- Colclough, G. L., Woolrich, M. W., Tewarie, P. K., Brookes, M. J., Quinn, A. J., & Smith, S. M. (2016). How reliable are MEG resting-state connectivity metrics? *NeuroImage*, *138*, 284–293.
- de Pasquale, F., Della Penna, S., Sporns, O., Romani, G. L., & Corbetta, M. (2016). A Dynamic Core Network and Global Efficiency in the Resting Human Brain. *Cerebral Cortex*, *26*, 4015–4033.

- de Reus, M. A., & van den Heuvel, M. P. (2013). The parcellation-based connectome: Limitations and extensions. *NeuroImage*, *80*, 397–404.
- Demuru, M., Gouw, A. A., Hillebrand, A., Stam, C. J., van Dijk, B. W., Scheltens, P., ... Visser, P. J. (2017). Functional and effective whole brain connectivity using magnetoencephalography to identify monozygotic twin pairs. *Scientific Reports*, *7*, 9685.
- Demuru, Matteo, & Fraschini, M. (2020). EEG fingerprinting: Subject-specific signature based on the aperiodic component of power spectrum. *Computers in Biology and Medicine*, *120*, 103748.
- Desikan, R. S., Ségonne, F., Fischl, B., Quinn, B. T., Dickerson, B. C., Blacker, D., ... Killiany, R. J. (2006). An automated labeling system for subdividing the human cerebral cortex on MRI scans into gyral based regions of interest. *NeuroImage*, *31*, 968–980.
- DESTRIEUX, C., FISCHL, B., DALE, A., & HALGREN, E. (2010). Automatic parcellation of human cortical gyri and sulci using standard anatomical nomenclature. *NeuroImage*, *53*, 1–15.
- Engel, A. K., & Fries, P. (2010). Beta-band oscillations—Signalling the status quo? *Current Opinion in Neurobiology*, *20*, 156–165.
- Engels, M. M. A., van der Flier, W. M., Stam, C. J., Hillebrand, A., Scheltens, Ph., & van Straaten, E. C. W. (2017). Alzheimer's disease: The state of the art in resting-state magnetoencephalography. *Clinical Neurophysiology*, *128*, 1426–1437.
- Fernandes, B. S., Williams, L. M., Steiner, J., Leboyer, M., Carvalho, A. F., & Berk, M. (2017). The new field of 'precision psychiatry.' *BMC Medicine*, *15*, 80.
- Finn, E. S., Shen, X., Scheinost, D., Rosenberg, M. D., Huang, J., Chun, M. M., ... Constable, R. T. (2015). Functional connectome fingerprinting: Identifying individuals based on patterns of brain connectivity. *Nature Neuroscience*, *18*, 1664–1671.
- Fornito, A., Arnatkevičiūtė, A., & Fulcher, B. D. (2019). Bridging the Gap between Connectome and Transcriptome. *Trends in Cognitive Sciences*, *23*, 34–50.

- Fornito, A., & Bullmore, E. T. (2015). Connectomics: A new paradigm for understanding brain disease. *European Neuropsychopharmacology*, *25*, 733–748.
- Fornito, A., Zalesky, A., & Breakspear, M. (2015). The connectomics of brain disorders. *Nature Reviews Neuroscience*, *16*, 159–172.
- Fornito, A., Zalesky, A., & Bullmore, E. (2016). *Fundamentals of Brain Network Analysis*. Academic Press.
- Friston, K. J. (1994). Functional and effective connectivity in neuroimaging: A synthesis. *Human Brain Mapping*, *2*, 56–78.
- Garcés, P., Pereda, E., Hernández-Tamames, J. A., Del-Pozo, F., Maestú, F., & Pineda-Pardo, J. Á. (2016). Multimodal description of whole brain connectivity: A comparison of resting state MEG, fMRI, and DWI. *Human Brain Mapping*, *37*, 20–34.
- Glasser, M. F., Sotiropoulos, S. N., Wilson, J. A., Coalson, T. S., Fischl, B., Andersson, J. L., ... Jenkinson, M. (2013). The minimal preprocessing pipelines for the Human Connectome Project. *NeuroImage*, *80*, 105–124.
- Griffa, A., Ricaud, B., Benzi, K., Bresson, X., Daducci, A., Vandergheynst, P., ... Hagmann, P. (2017). Transient networks of spatio-temporal connectivity map communication pathways in brain functional systems. *NeuroImage*, *155*, 490–502.
- Gross, J., Baillet, S., Barnes, G. R., Henson, R. N., Hillebrand, A., Jensen, O., ... Schoffelen, J.-M. (2013). Good practice for conducting and reporting MEG research. *NeuroImage*, *65*, 349–363.
- Hagmann, P. (2005). From diffusion MRI to brain connectomics.
- Hampel, H., Vergallo, A., Perry, G., Lista, S., & Alzheimer Precision Medicine Initiative (APMI). (2019). The Alzheimer Precision Medicine Initiative. *Journal of Alzheimer's Disease: JAD*, *68*, 1–24.
- Hipp, J. F., Hawellek, D. J., Corbetta, M., Siegel, M., & Engel, A. K. (2012). Large-scale cortical correlation structure of spontaneous oscillatory activity. *Nature Neuroscience*, *15*,



884–890.

- Hipp, J. F., & Siegel, M. (2015). BOLD fMRI Correlation Reflects Frequency-Specific Neuronal Correlation. *Current Biology*, *25*, 1368–1374.
- Klimesch, W. (2012). Alpha-band oscillations, attention, and controlled access to stored information. *Trends in Cognitive Sciences*, *16*, 606–617.
- Koo, T. K., & Li, M. Y. (2016). A Guideline of Selecting and Reporting Intraclass Correlation Coefficients for Reliability Research. *Journal of Chiropractic Medicine*, *15*, 155–163.
- Lachaux, J.-P., Rodriguez, E., Martinerie, J., & Varela, F. J. (1999). Measuring phase synchrony in brain signals. *Human Brain Mapping*, *8*, 194–208.
- Lankinen, K., Saari, J., Hlushchuk, Y., Tikka, P., Parkkonen, L., Hari, R., & Koskinen, M. (2018). Consistency and similarity of MEG- and fMRI-signal time courses during movie viewing. *NeuroImage*, *173*, 361–369.
- Larson-Prior, L. J., Oostenveld, R., Della Penna, S., Michalareas, G., Prior, F., Babajani-Feremi, A., ... Snyder, A. Z. (2013). Adding dynamics to the Human Connectome Project with MEG. *NeuroImage*, *80*, 190–201.
- Liljeström, M., Stevenson, C., Kujala, J., & Salmelin, R. (2015). Task- and stimulus-related cortical networks in language production: Exploring similarity of MEG- and fMRI-derived functional connectivity. *NeuroImage*, *120*, 75–87.
- Mansour L, S., Tian, Y., Yeo, B. T. T., Cropley, V., & Zalesky, A. (2021). High-resolution connectomic fingerprints: Mapping neural identity and behavior. *NeuroImage*, *229*, 117695.
- McGraw, K. O., & Wong, S. P. (1996). Forming inferences about some intraclass correlation coefficients. *Psychological Methods*, *1*, 30–46.
- Miranda-Dominguez, O., Mills, B. D., Carpenter, S. D., Grant, K. A., Kroenke, C. D., Nigg, J. T., & Fair, D. A. (2014). Connectotyping: Model Based Fingerprinting of the Functional Connectome. *PLOS ONE*, *9*, e111048.

- Nolte, G. (2003). The magnetic lead field theorem in the quasi-static approximation and its use for magnetoencephalography forward calculation in realistic volume conductors. *Physics in Medicine and Biology*, *48*, 3637–3652.
- Oostenveld, R., Fries, P., Maris, E., & Schoffelen, J.-M. (2010, December 23). FieldTrip: Open Source Software for Advanced Analysis of MEG, EEG, and Invasive Electrophysiological Data [Research Article].
- Palva, S., & Palva, J. M. (2012). Discovering oscillatory interaction networks with M/EEG: Challenges and breakthroughs. *Trends in Cognitive Sciences*, *16*, 219–230.
- Pasquale, F. de, Penna, S. D., Snyder, A. Z., Lewis, C., Mantini, D., Marzetti, L., ... Corbetta, M. (2010). Temporal dynamics of spontaneous MEG activity in brain networks. *Proceedings of the National Academy of Sciences*, *107*, 6040–6045.
- Power, J. D., Schlaggar, B. L., Lessov-Schlaggar, C. N., & Petersen, S. E. (2013). Evidence for hubs in human functional brain networks. *Neuron*, *79*, 798–813.
- Smith, S., Nichols, T., Vidaurre, D., Winkler, A., Behrens, T., Glasser, M., ... Miller, K. (2015). A positive-negative mode of population covariation links brain connectivity, demographics and behavior. *Nature Neuroscience*, *18*, 1565–1567.
- Sorrentino, P., Ambrosanio, M., Rucco, R., & Baselice, F. (2019). An extension of Phase Linearity Measurement for revealing cross frequency coupling among brain areas. *Journal of NeuroEngineering and Rehabilitation*, *16*, 135.
- Sporns, O., Tononi, G., & Kötter, R. (2005). The Human Connectome: A Structural Description of the Human Brain. *PLOS Computational Biology*, *1*, e42.
- Stam, C. J., & van Straaten, E. C. W. (2012). The organization of physiological brain networks. *Clinical Neurophysiology*, *123*, 1067–1087.
- Stam, Cornelis J. (2014). Modern network science of neurological disorders. *Nature Reviews Neuroscience*, *15*, 683–695.
- Stam, Cornelis J., Nolte, G., & Daffertshofer, A. (2007). Phase lag index: Assessment of

- functional connectivity from multi channel EEG and MEG with diminished bias from common sources. *Human Brain Mapping*, 28, 1178–1193.
- Tewarie, P., Hillebrand, A., van Dellen, E., Schoonheim, M. M., Barkhof, F., Polman, C. H., ... Stam, C. J. (2014). Structural degree predicts functional network connectivity: A multimodal resting-state fMRI and MEG study. *NeuroImage*, 97, 296–307.
- van Diessen, E., Numan, T., van Dellen, E., van der Kooi, A. W., Boersma, M., Hofman, D., ... Stam, C. J. (2015). Opportunities and methodological challenges in EEG and MEG resting state functional brain network research. *Clinical Neurophysiology*, 126, 1468–1481.
- Van Essen, D. C., Ugurbil, K., Auerbach, E., Barch, D., Behrens, T. E. J., Bucholz, R., ... Yacoub, E. (2012). The Human Connectome Project: A data acquisition perspective. *NeuroImage*, 62, 2222–2231.
- Van Essen, David C., Smith, S. M., Barch, D. M., Behrens, T. E. J., Yacoub, E., & Ugurbil, K. (2013). The WU-Minn Human Connectome Project: An overview. *NeuroImage*, 80, 62–79.
- Veen, B. D. V., Drongelen, W. V., Yuchtman, M., & Suzuki, A. (1997). Localization of brain electrical activity via linearly constrained minimum variance spatial filtering. *IEEE Transactions on Biomedical Engineering*, 44, 867–880.
- Vinck, M., Oostenveld, R., van Wingerden, M., Battaglia, F., & Pennartz, C. M. A. (2011). An improved index of phase-synchronization for electrophysiological data in the presence of volume-conduction, noise and sample-size bias. *NeuroImage*, 55, 1548–1565.
- Wirlich, J., Amico, E., Giraud, A.-L., Goñi, J., & Sadaghiani, S. (2020). Multi-timescale hybrid components of the functional brain connectome: A bimodal EEG-fMRI decomposition. *Network Neuroscience*, 4, 658–677.
- Woolrich, M., Hunt, L., Groves, A., & Barnes, G. (2011). MEG beamforming using Bayesian PCA for adaptive data covariance matrix regularization. *NeuroImage*, 57, 1466–1479.

Yeo, B. T. T., Krienen, F. M., Sepulcre, J., Sabuncu, M. R., Lashkari, D., Hollinshead, M., ...

Buckner, R. L. (2011). The organization of the human cerebral cortex estimated by intrinsic functional connectivity. *Journal of Neurophysiology*, *106*, 1125–1165.

## Supplementary for Exploring brain fingerprints of magnetoencephalography data: evaluation, pitfalls and interpretations

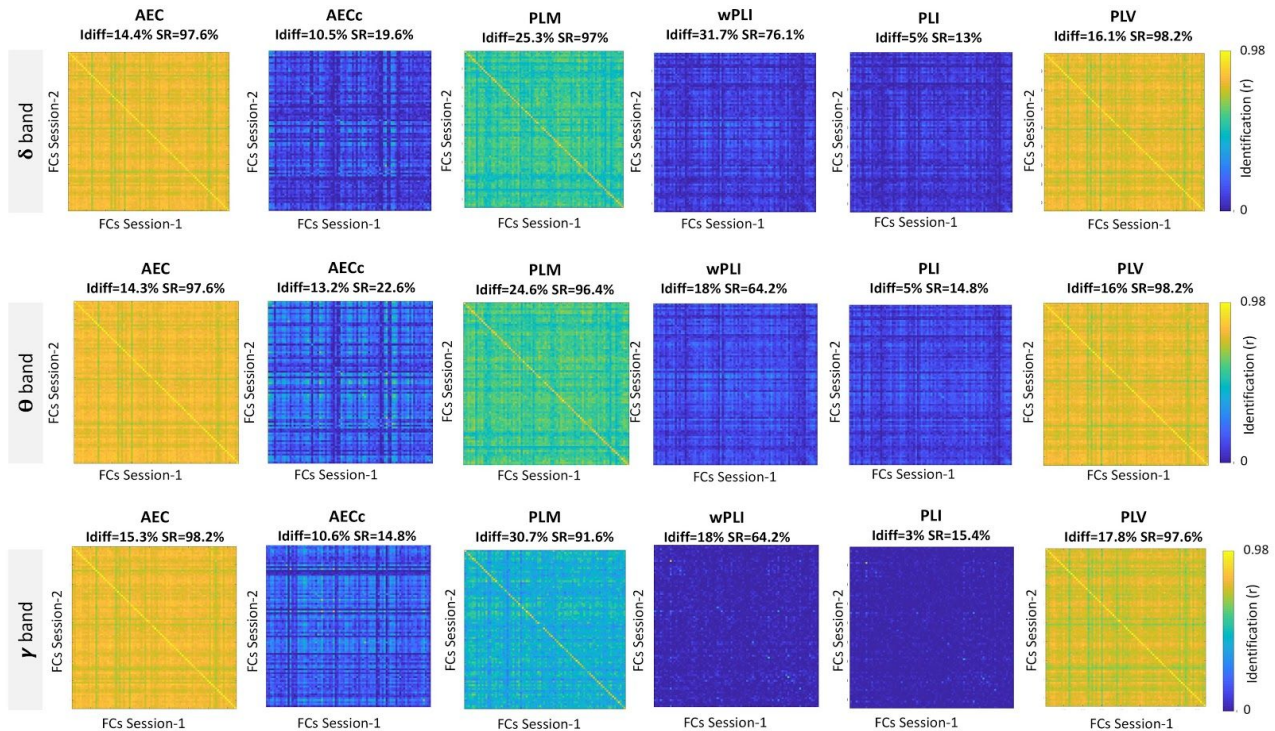

**Fig. S1. MEG connectome fingerprints across bands and measures.** Figure shows the performance in connectome identification of four popular phase-based MEG connectome measures (wPLI, PLI, PLV, PLM) and two amplitude based measures (AEC, AECc), across three frequency bands (delta, theta, and gamma). (A) Identifiability matrix for the six connectivity measures employed, shown for the alpha and beta bands. (B) Bar plots showing the summary of identification scores employed, i.e., Idiff and success rate (SR), across the different measures and frequency bands.

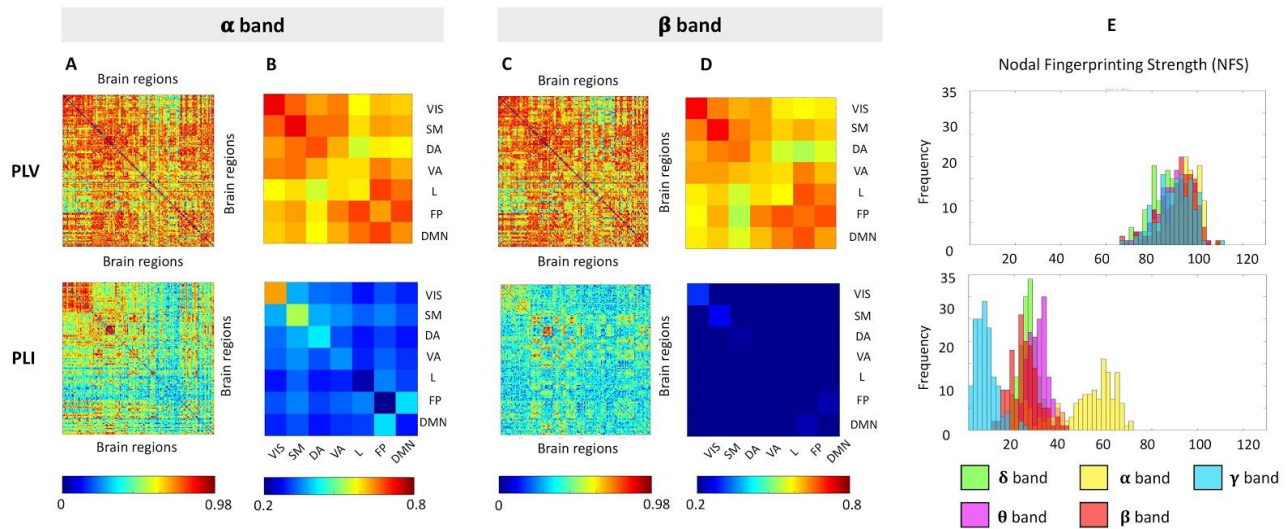

**Fig. S2. Edgewise fingerprinting across connectivity measures and bands.** (A)-(C) Edgewise MEG connectivity fingerprints as measured by intra-class correlation (ICC), reported for PLV and PLI functional connectivity measures, and for the alpha and beta bands, respectively. (B)-(D) The ICC average within and across the seven Yeo's resting-state network edges, for the alpha and beta bands, respectively. (E) The nodal fingerprinting strength distribution across the five frequency bands. VIS = visual; SM = sensorimotor; DA = dorsal attention; VA = ventral attention; L = limbic; FP = frontoparietal; DMN = default-mode network .



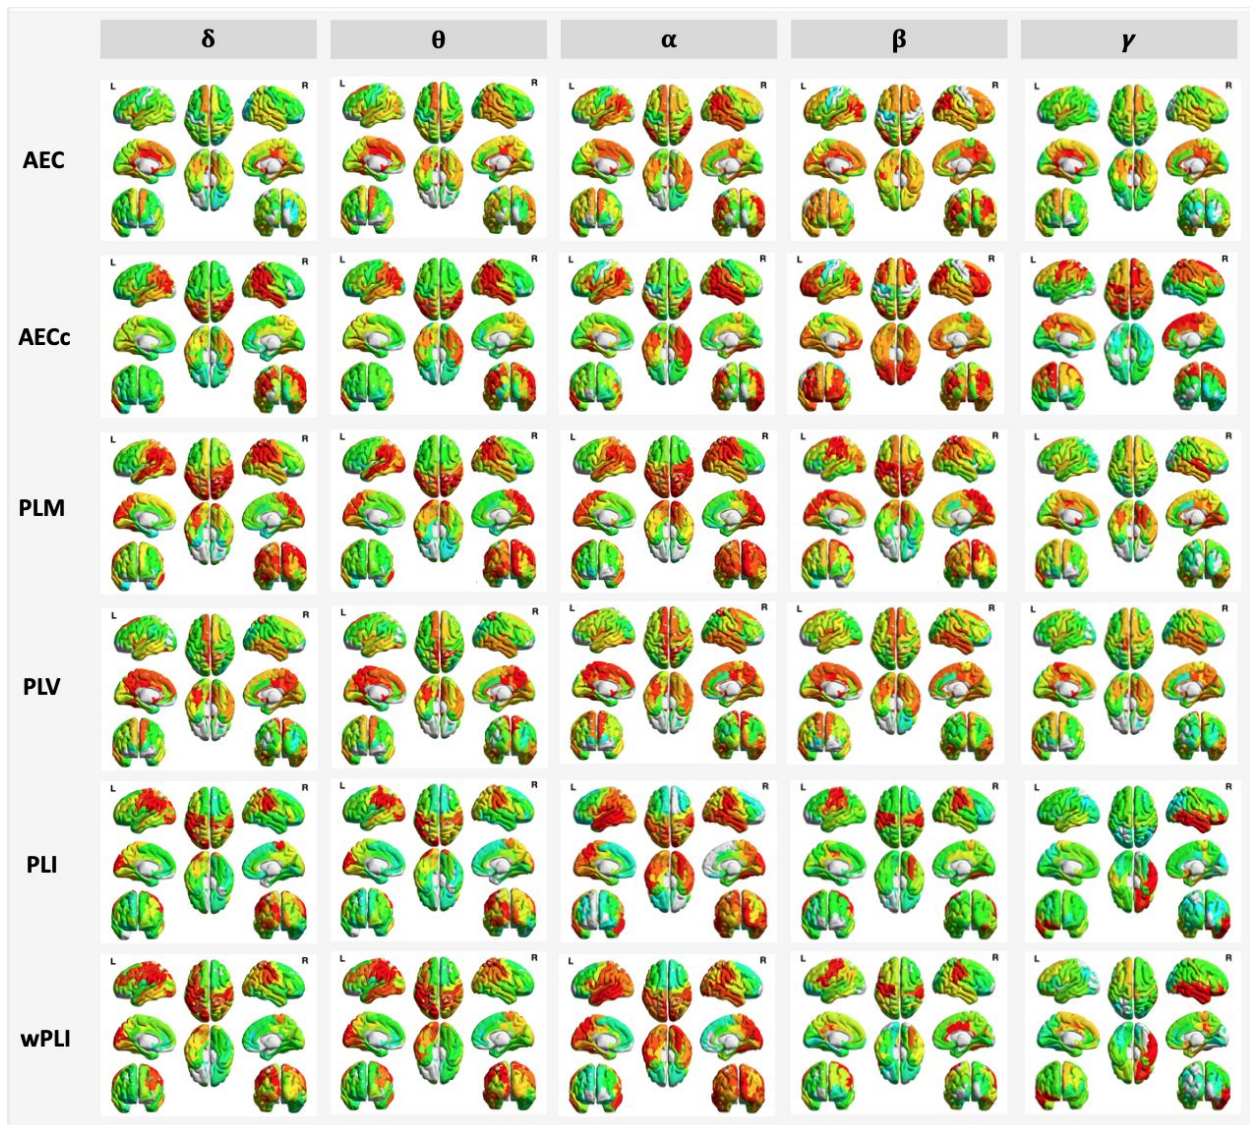

**Fig. S3. Nodal fingerprinting patterns in MEG.** Brain render of ICC subject identifiability as nodal fingerprinting strength per region for six MEG connectivity measures (AEC, AECc, PLM, PLV, PLI, and wPLI) and five frequency bands (delta, theta, alpha, beta, and gamma). The nodal fingerprinting strength per region computed as the sum of columns of ICC edgewise matrix and represented at 5<sup>th</sup>-95<sup>th</sup> percentile threshold.
